# Supplementary material for: A Framework to Ensure Patient Partners Have Equal and Contributing Voices Throughout the Research Program Evaluation Process
Source: PubMed Central journal article supplement — Can J Kidney Health Dis. 2020 Nov 26;7:2054358120970093. doi: 10.1177/2054358120970093 (PMC7705288; doi:10.1177/2054358120970093), 2020-11-26
Supplement: sj-pdf-2-cjk-10.1177_2054358120970093.pdf [file sj-pdf-2-cjk-10.1177_2054358120970093.pdf]

**Can-SOLVE CKD Research Operations Committee  
Evaluation Checklist**

|                       |                           |
|-----------------------|---------------------------|
| <b>Project Title:</b> | Click here to enter text. |
| <b>Project Lead:</b>  | Click here to enter text. |
| <b>Reviewer:</b>      | Click here to enter text. |
| <b>Date:</b>          | Click here to enter text. |

| Checklist                                                                             | Assessment criteria                                                                                                                                                                                | Feedback and recommendations |
|---------------------------------------------------------------------------------------|----------------------------------------------------------------------------------------------------------------------------------------------------------------------------------------------------|------------------------------|
| <b>A. Accomplishments to date</b>                                                     |                                                                                                                                                                                                    |                              |
| <input type="checkbox"/> Yes <input type="checkbox"/> No                              | Has the project team performed as per Workplan/Gantt chart? If not, please provide recommendations.                                                                                                | Click here to enter text.    |
| <input type="checkbox"/> Yes <input type="checkbox"/> No                              | Is the project on schedule? If not, please provide recommendations.                                                                                                                                |                              |
| <input type="checkbox"/> Yes <input type="checkbox"/> No <input type="checkbox"/> N/A | For clinical trials, is enrollment on target? If not, please provide recommendations and indicate if a referral to Clinical Nephrology Trials Network is needed.                                   |                              |
| <b>B. Design of work proposed for next 12 months</b>                                  |                                                                                                                                                                                                    |                              |
| <input type="checkbox"/> Yes <input type="checkbox"/> No                              | Is the scope of work proposed feasible within 12 month period? If not, please provide recommendations.                                                                                             | Click here to enter text.    |
| <input type="checkbox"/> Yes <input type="checkbox"/> No                              | Have there been significant changes to the project plan? If so, please identify them and indicate if there are any concerns.                                                                       |                              |
| <b>C. Issues that limit productivity to date and mitigation strategies</b>            |                                                                                                                                                                                                    |                              |
| <input type="checkbox"/> Yes <input type="checkbox"/> No                              | Are the mitigation strategies fitting for the issues identified? If not, please provide recommendations.                                                                                           | Click here to enter text.    |
| <input type="checkbox"/> Yes <input type="checkbox"/> No                              | Has the project team identified all foreseeable issues? List any issues that you have identified and potential mitigation strategies.                                                              |                              |
| <b>D. Deliverables/outputs expected and alignment with Can-SOLVE CKD objectives</b>   |                                                                                                                                                                                                    |                              |
| <input type="checkbox"/> Yes <input type="checkbox"/> No                              | Do the project team members engaged reflect a patient-oriented research team? (ie. patient partners, policy makers, diverse clinicians and non-clinicians) If not, please provide recommendations. | Click here to enter text.    |
| <input type="checkbox"/> Yes <input type="checkbox"/> No                              | Has there been an effort in completing Patient-oriented Research Training for the project team?                                                                                                    |                              |

| Checklist                                                                                                                                                                                                                                                                                                                                                                                                                                                                                                                                                                                                                                                                                                                                                                                                                                                                                                | Assessment criteria                                                                                                                                                                                                                                                                                                                                                                                                                                                                                                       | Feedback and recommendations |
|----------------------------------------------------------------------------------------------------------------------------------------------------------------------------------------------------------------------------------------------------------------------------------------------------------------------------------------------------------------------------------------------------------------------------------------------------------------------------------------------------------------------------------------------------------------------------------------------------------------------------------------------------------------------------------------------------------------------------------------------------------------------------------------------------------------------------------------------------------------------------------------------------------|---------------------------------------------------------------------------------------------------------------------------------------------------------------------------------------------------------------------------------------------------------------------------------------------------------------------------------------------------------------------------------------------------------------------------------------------------------------------------------------------------------------------------|------------------------------|
| <input type="checkbox"/> Yes <input type="checkbox"/> No                                                                                                                                                                                                                                                                                                                                                                                                                                                                                                                                                                                                                                                                                                                                                                                                                                                 | Do the abstracts/presentations/articles/communication tools align with Can-SOLVE CKD objectives?                                                                                                                                                                                                                                                                                                                                                                                                                          |                              |
| <b>E. Achieved and planned patient engagement</b>                                                                                                                                                                                                                                                                                                                                                                                                                                                                                                                                                                                                                                                                                                                                                                                                                                                        |                                                                                                                                                                                                                                                                                                                                                                                                                                                                                                                           |                              |
| <input type="checkbox"/> Yes <input type="checkbox"/> No <input type="checkbox"/> N/A<br><input type="checkbox"/> Yes <input type="checkbox"/> No <input type="checkbox"/> N/A<br><br><input type="checkbox"/> Yes <input type="checkbox"/> No<br><br><input type="checkbox"/> Yes <input type="checkbox"/> No<br><br>Choose an item.<br>out of 10 | Are patient partners involved in the following research process? Check N/A if not appropriate to involve patients for that process for this project) <ul style="list-style-type: none"> <li>• Study design</li> <li>• Development of study protocol</li> <li>• Preparation for study execution</li> <li>• Data collection</li> <li>• Analyzing and interpretation data</li> <li>• Dissemination</li> <li>• Implementation</li> <li>• Monitoring and evaluation</li> </ul><br>Has a Patient Lead/Co-Leads been identified? | Click here to enter text.    |
|                                                                                                                                                                                                                                                                                                                                                                                                                                                                                                                                                                                                                                                                                                                                                                                                                                                                                                          | Has there been patient co-authorship on abstracts/presentations/articles/communication tools?                                                                                                                                                                                                                                                                                                                                                                                                                             |                              |
|                                                                                                                                                                                                                                                                                                                                                                                                                                                                                                                                                                                                                                                                                                                                                                                                                                                                                                          | How would you rate the quality of engagement out of 10? (ie. relationship between researchers and patient partners?) Please indicate your recommendations for further improvement.                                                                                                                                                                                                                                                                                                                                        |                              |

**Overall Assessment**

Strengths of this project

Areas of improvement

**Funding recommendation**

- Approval for funding to continue. Review is satisfactory.
- Funding to be on hold. Additional information is required for the review.
- Funding to be on hold. There are methodological/feasibility concerns that project team should address before funding is released.
- Stop funding. There are methodological/feasibility concerns that the project team failed to address.
